# Supplementary material
Source: PubMed Central journal article supplement (PMC5826142)
Supplement: AAC.02152-17_zac003186924s1.pdf [file AAC.02152-17_zac003186924s1.pdf]

**Table S1.** Antimicrobial susceptibility of the *E. coli* DH5a transformants producing the KPC-2 carbapenemase

| Isolate <sup>a</sup>               | MIC (µg/ml) of: <sup>c</sup> |     |     |       |       |       |      |      |      |       |      |     |      |       |       |       |      |
|------------------------------------|------------------------------|-----|-----|-------|-------|-------|------|------|------|-------|------|-----|------|-------|-------|-------|------|
|                                    | Amp                          | Ams | Tzp | Ctx   | Caz   | Fep   | Atm  | Imp  | Mem  | Etp   | Gen  | Amk | Tob  | Sxt   | Cip   | Col   | Tgc  |
| <i>E. coli</i> DH5a (pCfr-27569cz) | >64                          | 64  | >64 | 4     | 4     | 2     | >16  | 16   | 0.5  | 0.25  | 0.5  | 8   | 4    | ≤0.03 | ≤0.06 | ≤0.12 | 0.12 |
| <i>E. coli</i> DH5a (pCfr-31260cz) | >64                          | 64  | >64 | 2     | 8     | 2     | >16  | 32   | 0.25 | 0.25  | 0.5  | 1   | 2    | ≤0.03 | ≤0.06 | ≤0.12 | 0.12 |
| <i>E. coli</i> DH5a (pCfr-31816cz) | >64                          | 64  | 32  | 4     | 4     | 8     | 8    | 32   | 1    | >2    | 0.5  | 2   | 4    | ≤0.03 | ≤0.06 | ≤0.12 | 0.12 |
| <i>E. coli</i> DH5a (pCfr-33038cz) | >64                          | 64  | 32  | 8     | 4     | 2     | 16   | 16   | 0.5  | 1     | 0.5  | 2   | 0.5  | ≤0.03 | ≤0.06 | ≤0.12 | 0.12 |
| <i>E. coli</i> DH5a (pCfr-33795cz) | >64                          | >64 | >64 | >8    | >16   | 8     | >16  | 32   | 2    | >2    | 0.5  | 8   | 4    | ≤0.03 | ≤0.06 | ≤0.12 | 0.12 |
| <i>E. coli</i> DH5a (pCfr-36049cz) | >64                          | >64 | >64 | 4     | 16    | 4     | >16  | 32   | 1    | 1     | 0.5  | 8   | 8    | ≤0.03 | ≤0.06 | ≤0.12 | 0.12 |
| <i>E. coli</i> DH5a (pCfr-36808cz) | >64                          | 64  | >64 | 4     | 4     | 8     | >16  | 16   | 0.5  | 0.25  | 0.5  | 8   | 4    | ≤0.03 | ≤0.06 | ≤0.12 | 0.12 |
| <i>E. coli</i> DH5a (pKpn-35786cz) | >64                          | >64 | >64 | 4     | 16    | 4     | >16  | 8    | 0.5  | 0.25  | 0.5  | 16  | >8   | ≤0.03 | ≤0.06 | ≤0.12 | 0.12 |
| <i>E. coli</i> DH5a (pEco-36682cz) | >64                          | >64 | >64 | 4     | 16    | 8     | >16  | 32   | 0.5  | 0.25  | 0.5  | 8   | 4    | ≤0.03 | ≤0.06 | ≤0.12 | 0.12 |
| <i>E. coli</i> DH5a (pMmo-37590cz) | >64                          | >64 | >64 | >8    | >16   | 8     | >16  | 32   | 2    | >2    | 0.5  | 4   | 4    | ≤0.03 | ≤0.06 | ≤0.12 | 0.12 |
| <i>E. coli</i> DH5a (recipient)    | 4                            | 4   | 1   | ≤0.06 | ≤0.25 | ≤0.12 | 0.06 | 0.25 | 0.03 | ≤0.03 | 0.12 | 0.5 | 0.12 | ≤0.03 | ≤0.06 | ≤0.12 | 0.12 |

<sup>a</sup> Amp, ampicillin; Ams, Ampicillin-sulbactam (inhibitor fixed at 4 µg/ml); Tzp, piperacillin-tazobactam (inhibitor fixed at 4 µg/ml); Ctx, cefotaxime; Caz, ceftazidime; Fep, cefepime; Atm, aztreonam; Imp, imipenem; Mem, meropenem; Etp, ertapenem; Gen, gentamicin; Amk, amikacin; Tob, tobramycin; Sxt, trimethoprim-sulfamethoxazole; Cip, ciprofloxacin; Col, colistin; Tgc, tigecycline; Fos, fosfomycin.
